# Supplementary material
Source: publisher figshare collection journal article supplement (https://rs.figshare.com/ndownloader/files/13764014)
Supplement: Supplementary file 1 [file 13764014]

Table S1. Location and area of mangrove sites for potential Blue Carbon project in the Gulf of California, Mexico: BCS = Baja California Sur, BCN = Baja California Norte, Son = Sonora, and Sin = Sinaloa.

| Site | State | Latitude | Longitude | Area (ha) | Mangrove Area (ha) |
| --- | --- | --- | --- | --- | --- |
| Bahía Magdalena | BCS | 24.663356° | -111.857768° | 1,501.2 | 1,501.2 |
| El Conchalito, La Paz | BCS | 24.141764° | -110.347131° | 40.4 | S/D |
| Las Ánimas 2 | BCN | 28.802738° | -113.337485° | 519.7 | 11.8 |
| Isla Las Ánimas | Sin | 25.596528° | -109.140253° | 814.0 | 814.0 |
| Isla Tachichitle | Sin | 24.924876° | -108.045395° | 4,454.4 | 187.0 |
| Isla Altamura | Sin | 25.089634° | -108.269904° | 1,939.6 | 616.4 |
| Isla Saliaca | Sin | 25.190014° | -108.319972° | 1,016.6 | 699.7 |
| Isla El Rancho | Sin | 25.151751° | -108.367954° | 397.6 | 13.4 |
| Santa María de la Reforma 1 | Sin | 25.261970° | -108.379679° | 1,985.0 | 1,822.4 |
| Isla Macapule | Sin | 25.329426° | -108.593806° | 1,294.9 | 858.0 |
| Isla Vinorama | Sin | 25.391390° | -108.769309° | 687.9 | 433.5 |
| Isla San Ignacio | Sin | 25.435599° | -108.896265° | 1,100.5 | 701.8 |
| Bahía Topolobampo | Sin | 25.590821° | -109.081073° | 1,147.9 | 869.1 |
| Bahía Ohuira | Sin | 25.628361° | -108.918575° | 2,227.9 | 548.8 |
| Bahía Santa María 1 | Sin | 25.720584° | -109.248116° | 2,810.1 | 2,441.5 |
| Bahía Santa María 2 | Sin | 25.631402° | -109.163063° | 3,853.5 | 2,758.6 |
| Isla Santa Maria | Sin | 25.636067° | -109.243835° | 1,028.9 | 608.5 |
| Isla Lechugilla | Sin | 25.773324° | -109.393784° | 718.4 | 421.2 |
| Isla Huivulai | Son | 27.091604° | -110.013497° | 25.9 | 23.8 |
| Estero Santa Cruz | Son | 28.797692° | -111.875544° | 3,552.4 | 686.4 |
